# Supplementary material for: A bioreducible supramolecular nanoparticle gene delivery system based on cyclodextrin-conjugated polyaspartamide and adamantyl-terminated polyethylenimine
Source: Royal Society of Chemistry journal article supplement (doi:10.1039/c7tb02170d), 2018-01-01
Supplement: c7tb02170d1.pdf [file c7tb02170d1.pdf]

## Supplementary Information

### **A bio reducible supramolecular nanoparticle gene delivery system based on cyclodextrin-conjugated polyaspartamide and adamantyl- terminated polyethylenimine**

Yunti Zhang<sup>†</sup>, Qimin Jiang<sup>†</sup>, Bo Bi<sup>†</sup>, Luming Xu<sup>‡</sup>, Jia Liu<sup>‡</sup>, Renxi Zhuo<sup>†</sup>, Xulin Jiang<sup>†\*</sup>

<sup>†</sup>Key Laboratory of Biomedical Polymers of the Ministry of Education & Department of Chemistry, Wuhan University, Wuhan 430072, P. R. China.

<sup>‡</sup>Research Center for Tissue Engineering and Regenerative Medicine, Union Hospital, Tongji Medical College, Huazhong University of Science and Technology, Wuhan 430022, P. R. China.

\*Corresponding author: Xulin Jiang

Key Laboratory of Biomedical Polymers of Ministry of Education & Department of Chemistry, Wuhan University, Luojia Hill, Wuhan 430072, P. R. China.

Tel.: +86-27-68755200; Fax: +86-27-68754509. E-mail address: xljiang@whu.edu.cn.

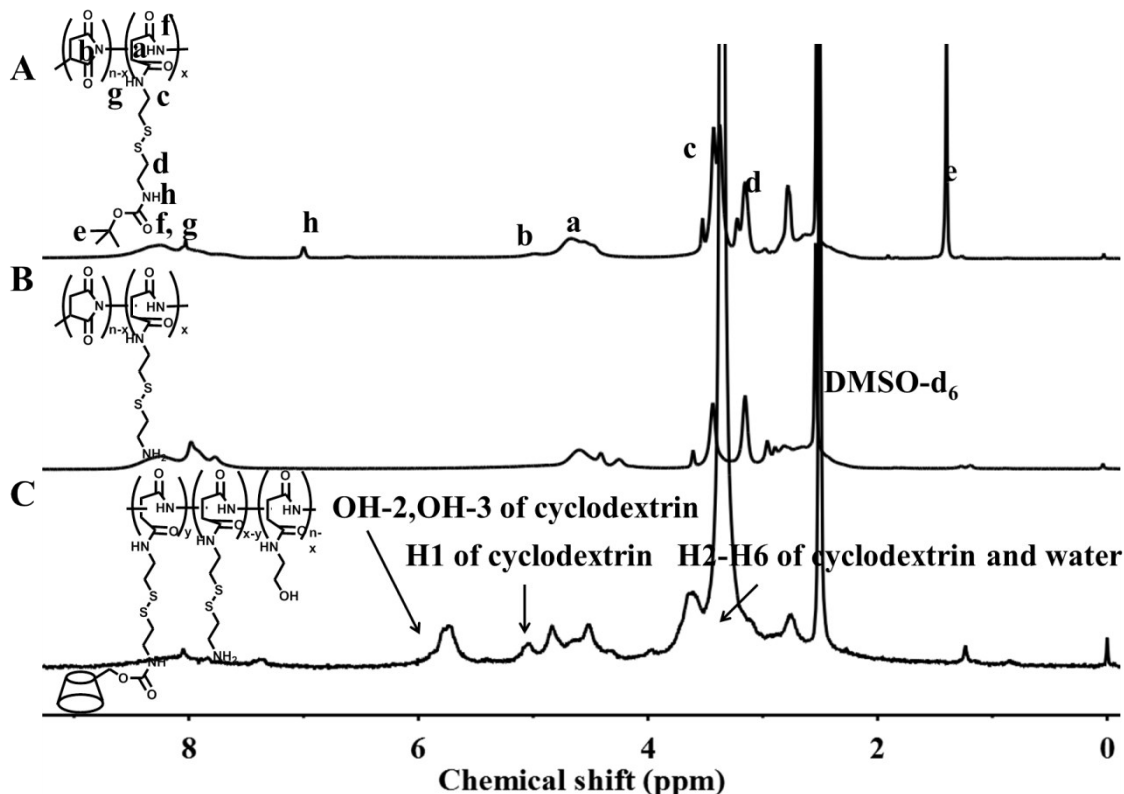

**Fig. S1**  $^1\text{H}$  NMR spectrum of (A) Pasp-Cyst-Boc, (B) Pasp-Cyst and (C) Pasp-SS-CD in  $\text{DMSO-d}_6$ .

#### Quantification of $\beta$ -cyclodextrin in Pasp-SS-CD.

Preparation of standard  $\beta$ -CD solution: An accurate amount of  $\beta$ -CD was dissolved in distilled water and the final concentration was 1.0 mg/mL.

Preparation of standard phenolphthalein solution: An accurate amount of phenolphthalein was dissolved in 60% ethanol and the final concentration was 1.0 mg/mL.

Method: Mix different volume of standard  $\beta$ -CD solution, 0.5 mL standard phenolphthalein solution and 10 mL buffer ( $\text{Na}_2\text{CO}_3/\text{NaHCO}_3$ , pH 10.5) in 100 mL volumetric flask, then dilute the solution with distilled water to 100 mL, then the mixed solution was incubated for 30 min at 25  $^\circ\text{C}$  and the color intensity was measured at 552 nm using UV-Vis spectrometer (PerkinElmer Lambda 35). The standard curve (Fig. S2) can be obtained with  $C_{\beta\text{-CD}}$  (the concentration of  $\beta$ -CD, mg/100mL) as x-axis and A (the absorbance) as y-axis. From the calibration curve, it can be concluded that  $\beta$ -CD is linear correlated with A within the concentration of 0.5~2.5 mg/100 mL. Then we can quantify

the amount of CD in the polymer Pasp-SS-CD based on the calibration curve.

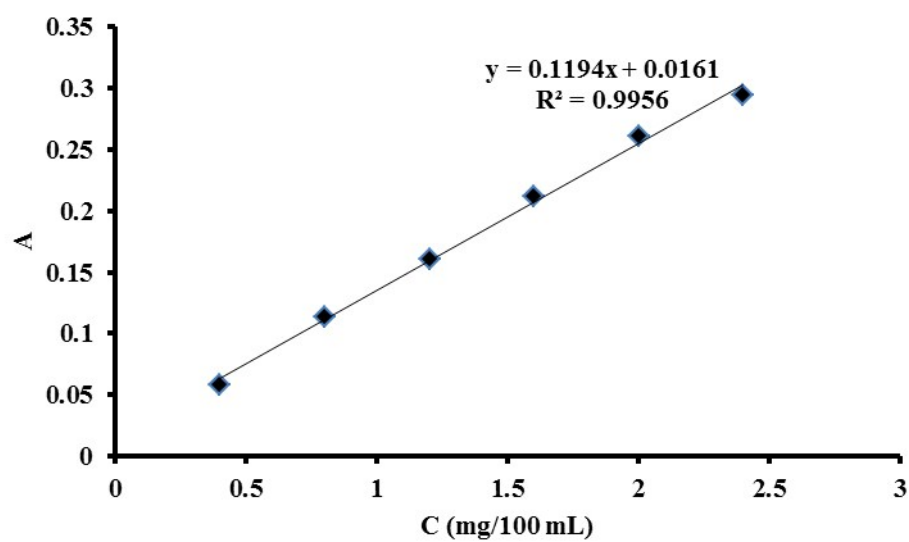

**Fig. S2** Standard curve of  $\beta$ -CD by UV-Vis at 552 nm.

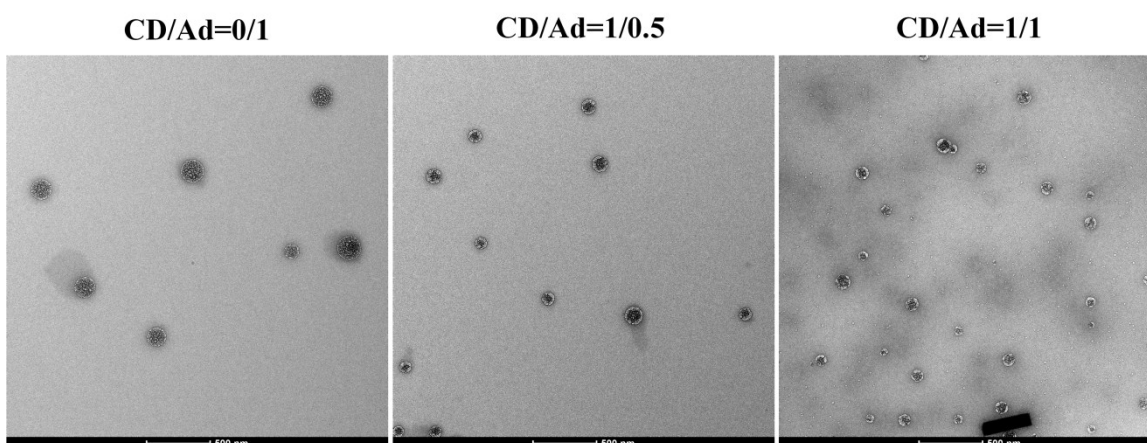

**Fig. S3** Transmission electron microscopy (TEM) images of SNPs at N/P ratio of 30 with different CD/Ad ratios (scale bar, 500 nm).

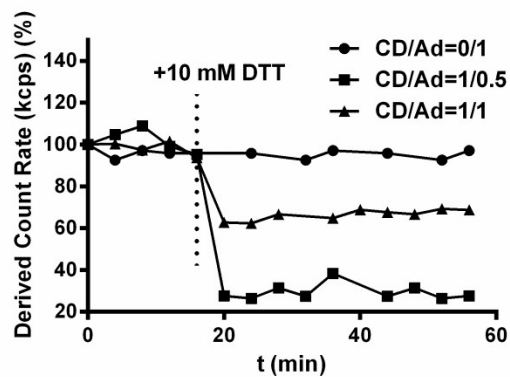

**Fig. S4** The light scattering intensity of SNPs with different CD/Ad ratios at N/P ratio of 30 measured by DLS before and after the addition of 10 mmol DTT at room temperature.

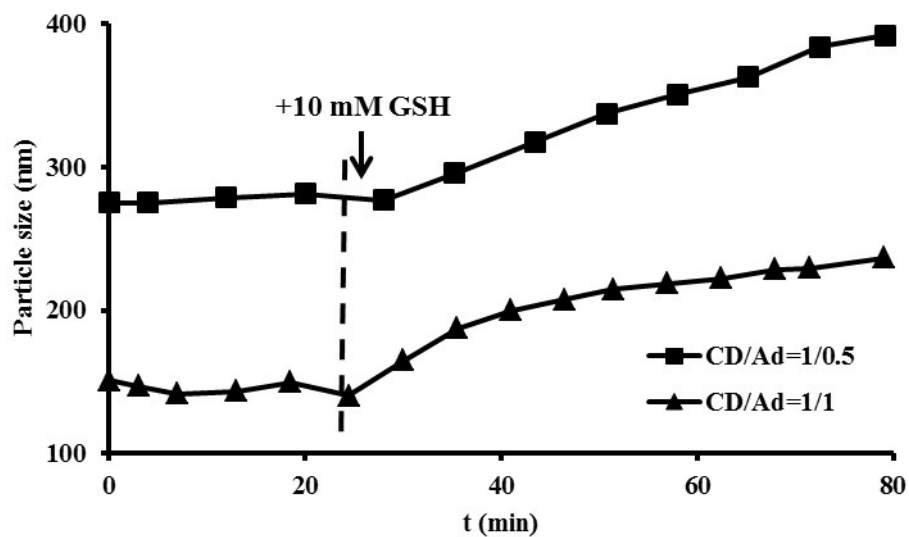

**Fig. S5** Sizes change of SNPs with different CD/Ad ratios at N/P ratio of 30 measured by DLS before and after the addition of 10 mmol GSH at room temperature in PBS.

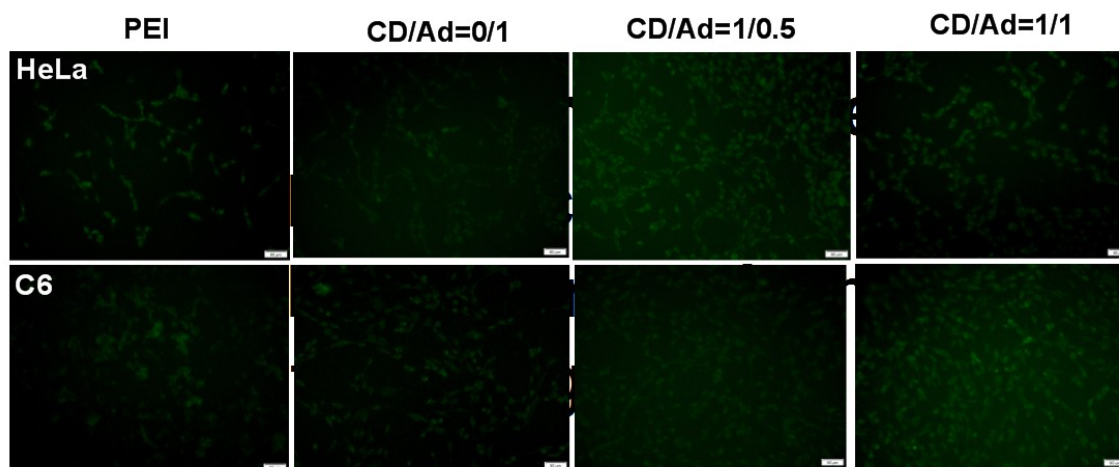

**Fig. S6** In vitro EGFP expression of different CD/Ad ratio polycation/pDNA nanoplexes in serum media at N/P ratio of 30 in comparison with that mediated by PEI/pDNA nanoplexes in HeLa and C6 cells. Scale bar, 50  $\mu$ m.

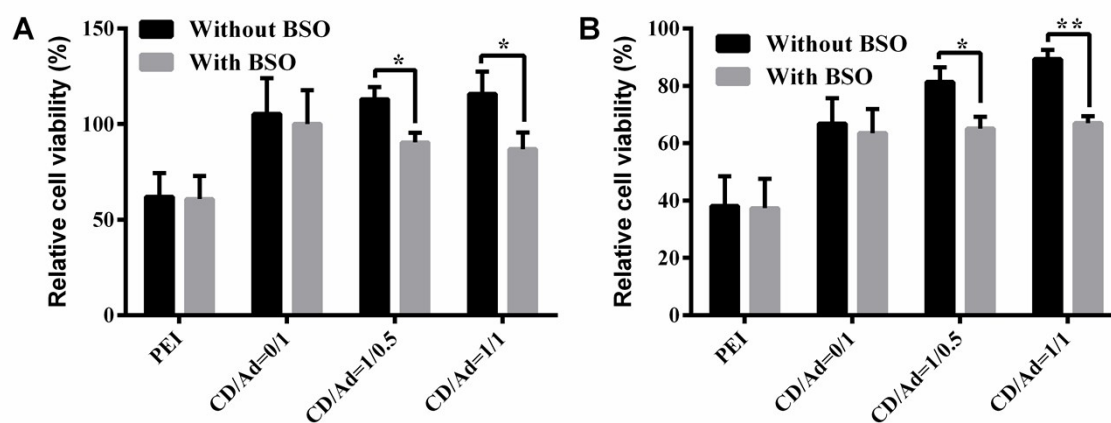

**Fig. S7** Cell viability of HeLa (A) and C6 (B) cells treated by 25 kDa PEI/pDNA polyplexes (N/P ratio=30) and SNPs with different CD/Ad ratios(N/P ratio=30) in the presence or absence of 0.2 mM BSO. All data represent mean  $\pm$  SD (n = 3, student's t test, \*P < 0.05, \*\*P < 0.01).

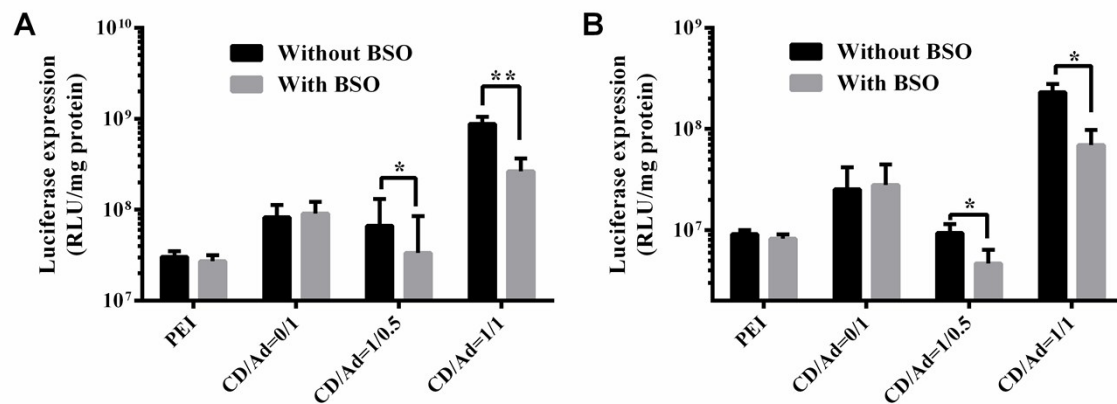

**Fig. S8** In vitro luciferase gene expression in HeLa (A) and C6 (B) cells transfected with 25 kDa PEI/pDNA polyplexes (N/P ratio=10) and SNPs with different CD/Ad ratios (N/P ratio=30) in the presence or absence of 0.2 mM BSO. All data represent mean  $\pm$  SD (n = 3, student's t test, \*P < 0.05, \*\*P < 0.01).
